# Supplementary material for: Biochar Mitigates the Negative Effects of Microplastics on Sugarcane Growth by Changing Soil Nutrients and Microbial Community Structure and Function
Source: Preprints.org preprint supplement (doi:10.20944/preprints202312.0251.v1), 2023-12-06
Supplement: Supplementary file 1 [file supplementary]

## Supplementary tables

**Table S1** The relative abundances of the most abundant phyla in different treatments.

|                                        | Taxon             | Relative abundances (%) in different treatments |                |                 |                 |                |                |
|----------------------------------------|-------------------|-------------------------------------------------|----------------|-----------------|-----------------|----------------|----------------|
|                                        |                   | CK                                              | Low PE         | High PE         | BC              | Low PE+BC      | High PE+BC     |
| 16S rRNA<br>gene-based<br>bacteria     | Proteobacteria    | 40.44a                                          | 39.93a         | 42.35a          | 45.10a          | 38.27a         | 40.11a         |
|                                        | Chloroflexi       | 7.95a                                           | 9.49a          | 13.40a          | 8.28a           | 7.90a          | 7.70a          |
|                                        | Actinobacteriota  | 11.96a                                          | 16.29a         | 8.69a           | 8.95a           | 11.34a         | 13.44a         |
|                                        | Acidobacteriota   | <b>7.71bc</b>                                   | <b>8.78bc</b>  | <b>7.36c</b>    | <b>10.94a</b>   | <b>9.35abc</b> | <b>9.81ab</b>  |
|                                        | Gemmatimonadota   | <b>9.86a</b>                                    | <b>7.62b</b>   | <b>8.10b</b>    | <b>8.20b</b>    | <b>8.19b</b>   | <b>5.88c</b>   |
|                                        | Verrucomicrobiota | 5.09a                                           | 2.40a          | 3.40a           | 2.06a           | 2.48a          | 1.88a          |
|                                        | Bacteroidota      | 3.00a                                           | 2.56a          | 4.18a           | 5.31a           | 3.52a          | 5.84a          |
|                                        | Firmicutes        | 2.45a                                           | 2.17a          | 1.86a           | 2.39a           | 3.75a          | 2.89a          |
|                                        | Myxococcota       | 1.86a                                           | 2.21a          | 2.14a           | 1.88a           | 1.79a          | 1.96a          |
|                                        | Patescibacteria   | 0.24a                                           | 0.25a          | 0.50a           | 0.50a           | 0.24a          | 0.53a          |
| <i>phoD</i> -<br>harboring<br>bacteria | Proteobacteria    | <b>81.488ab</b>                                 | <b>84.454a</b> | <b>83.605ab</b> | <b>79.338ab</b> | <b>85.482a</b> | <b>76.150b</b> |
|                                        | Actinobacteria    | 11.616a                                         | 10.105a        | 8.268a          | 11.260a         | 6.226a         | 13.762a        |
|                                        | Planctomycetes    | <b>0.008b</b>                                   | <b>0.018ab</b> | <b>0.031a</b>   | <b>0.027a</b>   | <b>0.018ab</b> | <b>0.024ab</b> |
|                                        | Acidobacteria     | <b>0.005b</b>                                   | <b>0.028a</b>  | <b>0.019ab</b>  | <b>0.018ab</b>  | <b>0.010ab</b> | <b>0.011ab</b> |
|                                        | Firmicutes        | 0.000a                                          | 0.004a         | 0.002a          | 0.002a          | 0.004a         | 0.000a         |
|                                        | Bacteroidetes     | 0.000a                                          | 0.000a         | 0.002a          | 0.000a          | 0.001a         | 0.000a         |
|                                        | Cyanobacteria     | 0.001a                                          | 0.000a         | 0.000a          | 0.000a          | 0.000a         | 0.000a         |

Different lowercase letters in the same row indicate significant differences among the six treatments ( $P<0.05$ ).

**Table S2** The relative abundances of the 10 most abundant genera in different treatments.

|                                 | Taxon             | Relative abundances (%) in different treatments |                 |                |                |                |                |
|---------------------------------|-------------------|-------------------------------------------------|-----------------|----------------|----------------|----------------|----------------|
|                                 |                   | CK                                              | Low PE          | High PE        | BC             | Low PE+BC      | High PE+BC     |
| 16S rRNA gene-based bacteria    | Pedospaeraceae    | <b>4.42a</b>                                    | <b>1.64ab</b>   | <b>1.99ab</b>  | <b>1.56b</b>   | <b>2.00ab</b>  | <b>1.09b</b>   |
|                                 | Dongia            | 1.59a                                           | 2.16a           | 2.80a          | 2.96a          | 2.21a          | 2.45a          |
|                                 | TRA3-20           | <b>3.86a</b>                                    | <b>3.00ab</b>   | <b>3.43a</b>   | <b>3.20ab</b>  | <b>2.33b</b>   | <b>2.17b</b>   |
|                                 | SC-I-84           | <b>2.97a</b>                                    | <b>1.51ab</b>   | <b>1.66ab</b>  | <b>2.04ab</b>  | <b>1.34b</b>   | <b>0.70b</b>   |
|                                 | Subgroup_10       | <b>1.58c</b>                                    | <b>1.71bc</b>   | <b>1.07c</b>   | <b>3.27a</b>   | <b>2.93ab</b>  | <b>2.23ab</b>  |
|                                 | IMCC26256         | 0.65a                                           | 2.03a           | 2.18a          | 0.26a          | 0.64a          | 1.55a          |
|                                 | Sphingomonas      | <b>2.78ab</b>                                   | <b>3.66a</b>    | <b>2.29b</b>   | <b>2.78ab</b>  | <b>2.66ab</b>  | <b>2.54ab</b>  |
|                                 | Bacillus          | <b>1.46ab</b>                                   | <b>1.06ab</b>   | <b>0.59b</b>   | <b>0.64b</b>   | <b>2.27a</b>   | <b>1.17ab</b>  |
|                                 | Ellin6067         | <b>2.46ab</b>                                   | <b>1.90bc</b>   | <b>2.71a</b>   | <b>2.75a</b>   | <b>1.40c</b>   | <b>1.44c</b>   |
| <i>phoD</i> -harboring bacteria | Pseudomonas       | 0.68a                                           | 0.43a           | 0.98a          | 0.47a          | 0.81a          | 1.74a          |
|                                 | Amycolatopsis     | 6.918a                                          | 1.606a          | 2.022a         | 5.005a         | 1.679a         | 2.417a         |
|                                 | Streptomyces      | <b>0.560c</b>                                   | <b>2.347a</b>   | <b>1.461b</b>  | <b>0.300c</b>  | <b>0.543c</b>  | <b>1.212bc</b> |
|                                 | Bradyrhizobium    | 0.598a                                          | 0.265a          | 0.441a         | 1.884a         | 0.296a         | 0.237a         |
|                                 | Sinorhizobium     | 0.096a                                          | 0.161a          | 0.291a         | 0.156a         | 0.267a         | 0.078a         |
|                                 | Phaeobacter       | 0.056a                                          | 0.100a          | 0.050a         | 0.112a         | 0.110a         | 0.054a         |
|                                 | Pseudomonas       | 0.006 a                                         | 0.008a          | 0.018a         | 0.006a         | 0.007a         | 0.008a         |
|                                 | Actinoplanes      | <b>0.048a</b>                                   | <b>0.033ab</b>  | <b>0.021ab</b> | <b>0.035ab</b> | <b>0.005b</b>  | <b>0.037ab</b> |
|                                 | Frankia           | 0.018a                                          | 0.018a          | 0.038a         | 0.013a         | 0.029a         | 0.017a         |
|                                 | Saccharopolyspora | <b>0.007ab</b>                                  | <b>0.005ab</b>  | <b>0.000b</b>  | <b>0.013a</b>  | <b>0.001ab</b> | <b>0.004ab</b> |
|                                 | Stella            | <b>0.007bc</b>                                  | <b>0.015abc</b> | <b>0.018ab</b> | <b>0.019a</b>  | <b>0.007bc</b> | <b>0.004c</b>  |

Different lowercase letters in the same row indicate significant differences among the six treatments ( $P<0.05$ ).
